# Supplementary material for: Exploration of structural transition phenomenon in flexible metal–organic framework formed on polymer substrate
Source: Royal Society of Chemistry journal article supplement (doi:10.1039/d1ce01383a), 2021-01-01
Supplement: d1ce01383a1.pdf [file d1ce01383a1.pdf]

## Supplementary Information

### Exploration of Structural Transition Phenomenon in Flexible Metal-Organic Framework Formed on Polymer Substrate

Shoya Hirao, Ruho Hamagami, Takashi Ohhashi, Keiichi Eguchi, Neo Kubo, Yohei Takashima, Kensuke Akamatsu, and Takaaki Tsuruoka\*

*Department of Nanobiochemistry, Frontiers of Innovative Research in Science and Technology (FIRST),*

*Konan University, 7-1-20 Minatojimaminami, Chuo-ku, Kobe 650-0047, Japan*

#### Contents:

1. Formation of different types of MOFs with structural transition.....2
2. Surface condition of the obtained samples characterized by water contact angle measurement.....3
3. Influence of polyimide on the structural transition.....4,5
4. Heat and water resistances of obtained crystals prepared by two-step approach.....6
5. Effect of KOH treatment time and temperature of polyimide films on the number of adsorbed metal ions and the thickness of hydrolyzed layer.....  
.....7
6. Reproducibility of the structural transition.....8

## 1. Formation of different types of MOFs with structural transition

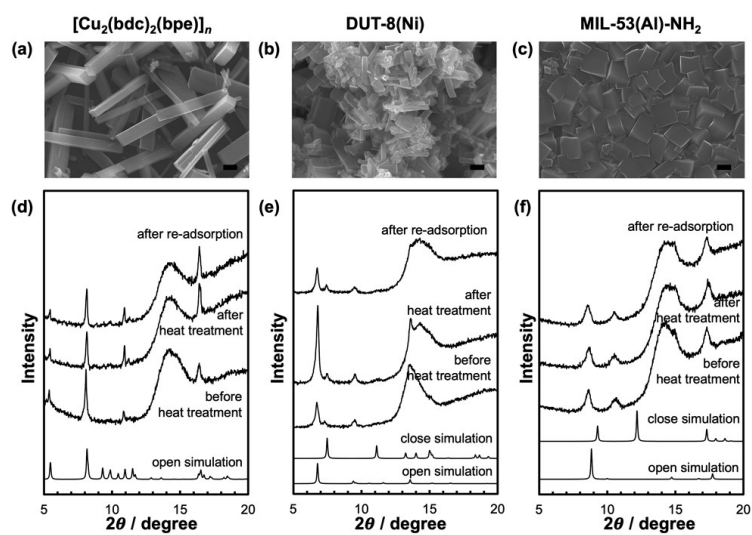

**Figure S1.** SEM images of samples prepared using the ion-doped substrate (scale bars: 1  $\mu\text{m}$ ); XRD patterns of as-prepared sample before and after heat treatment for solvent desorption and after re-adsorption of guest molecules.

## 2. Surface condition of the obtained samples characterized by water contact angle measurement

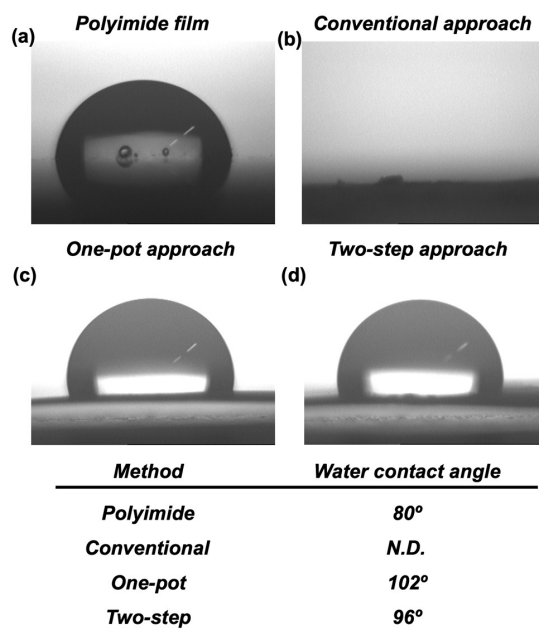

**Figure S2.** Optical images of water drop on samples prepared via conventional method and present two-step and one-pot approaches.

### 3. Influence of polyimide on the structural transition

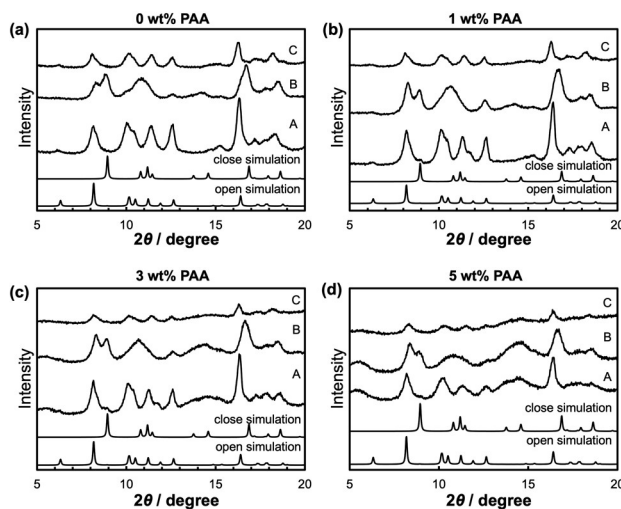

**Figure S3.** XRD patterns of samples prepared via conventional method in the presence of different amount (a: 0 wt%, b: 1 wt%, c: 3 wt%, d: 5 wt%) of poly(amic acid) before (A) and after heat treatment for solvent desorption (B) and after re-adsorption of the guest molecules (C).

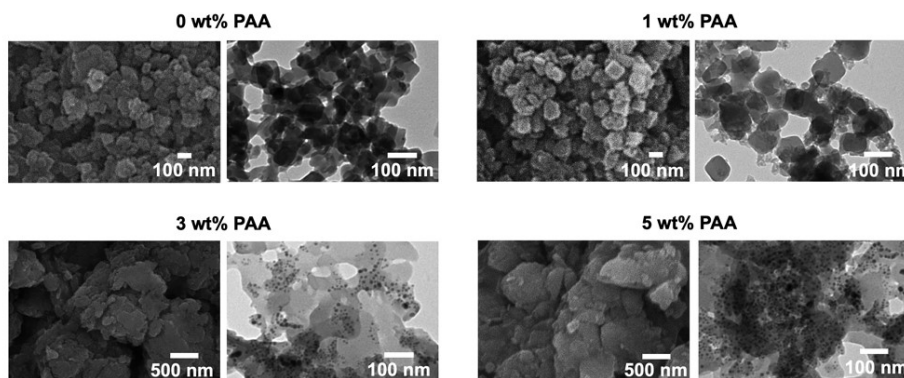

**Figure S4.** TEM images of samples prepared via conventional method in the presence of different amount (a: 0 wt%, b: 1 wt%, c: 3 wt%, d: 5 wt%) of poly(amic acid).

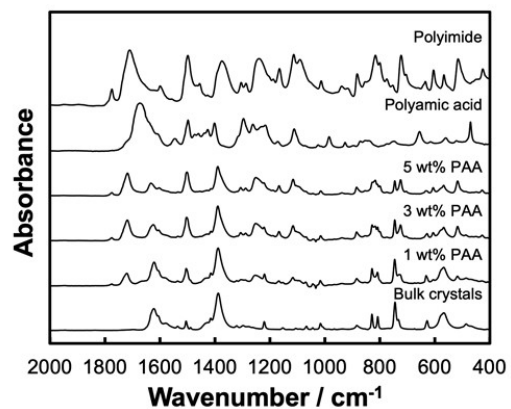

**Figure S5.** FT-IR spectra of samples prepared via conventional method in the presence of different amount (a: 0 wt%, b: 1 wt%, c: 3 wt%, d: 5 wt%) of poly(amic acid).

#### 4. Heat and water resistances of obtained crystals prepared by two-step approach

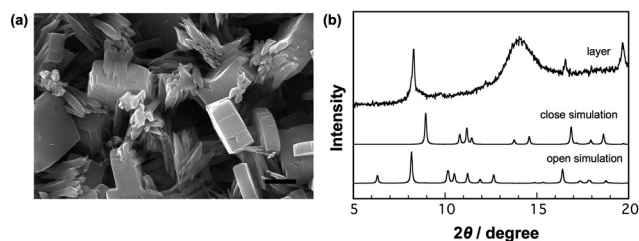

**Figure S6.** SEM image and XRD patterns of samples prepared by using only layer ligand (scale bar: 1 μm).

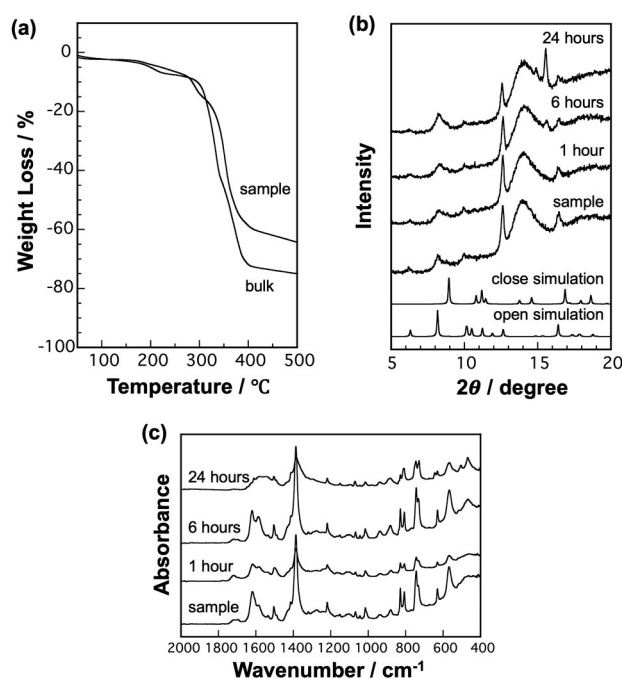

**Figure S7.** (a) TG analysis of samples prepared via present two-step approach. (b) XRD patterns and (c) FT-IR spectra of samples prepared via present two-step approach during water resistance test.

## 5. Effect of KOH treatment time and temperature of polyimide films on the number of adsorbed metal ions and the thickness of hydrolyzed layer

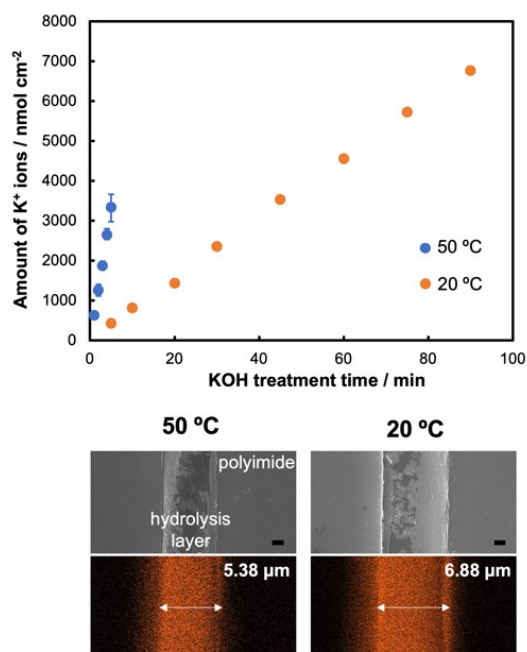

**Figure S8.** Effect of KOH treatment condition of polyimide film on the amount of potassium ions and cross-sectional SEM and EDX mapping images of polyimide at various hydrolysis temperature. Scale bars are 1 μm.

## 6. Reproducibility of the structural transition

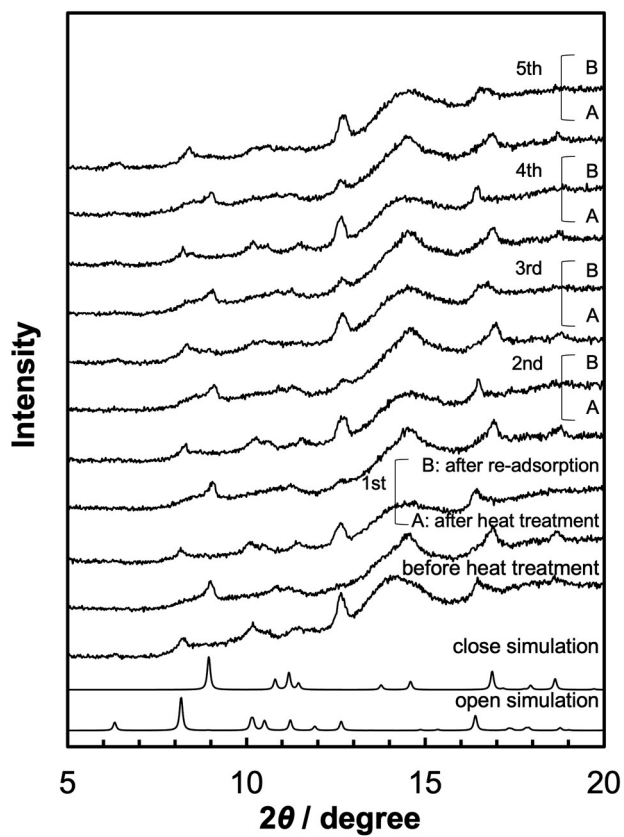

**Figure S9.** XRD patterns of reversible structural transition of samples prepared via two-step approach using polyimide films hydrolyzed at 20 °C.
